# Supplementary material for: The optimal platelet concentration in platelet-rich plasma for proliferation of human cells in vitro—diversity, biases, and possible basic experimental principles for further research in the field: A review
Source: PeerJ journal article supplement (doi:10.7717/peerj.10303), 2020-11-13
Supplement: Appendix_S1_PRISMA_2009_flow_diagram.pdf [file Appendix_S1_PRISMA_2009_flow_diagram.pdf]

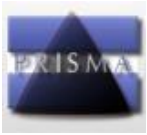

## PRISMA 2009 Flow Diagram

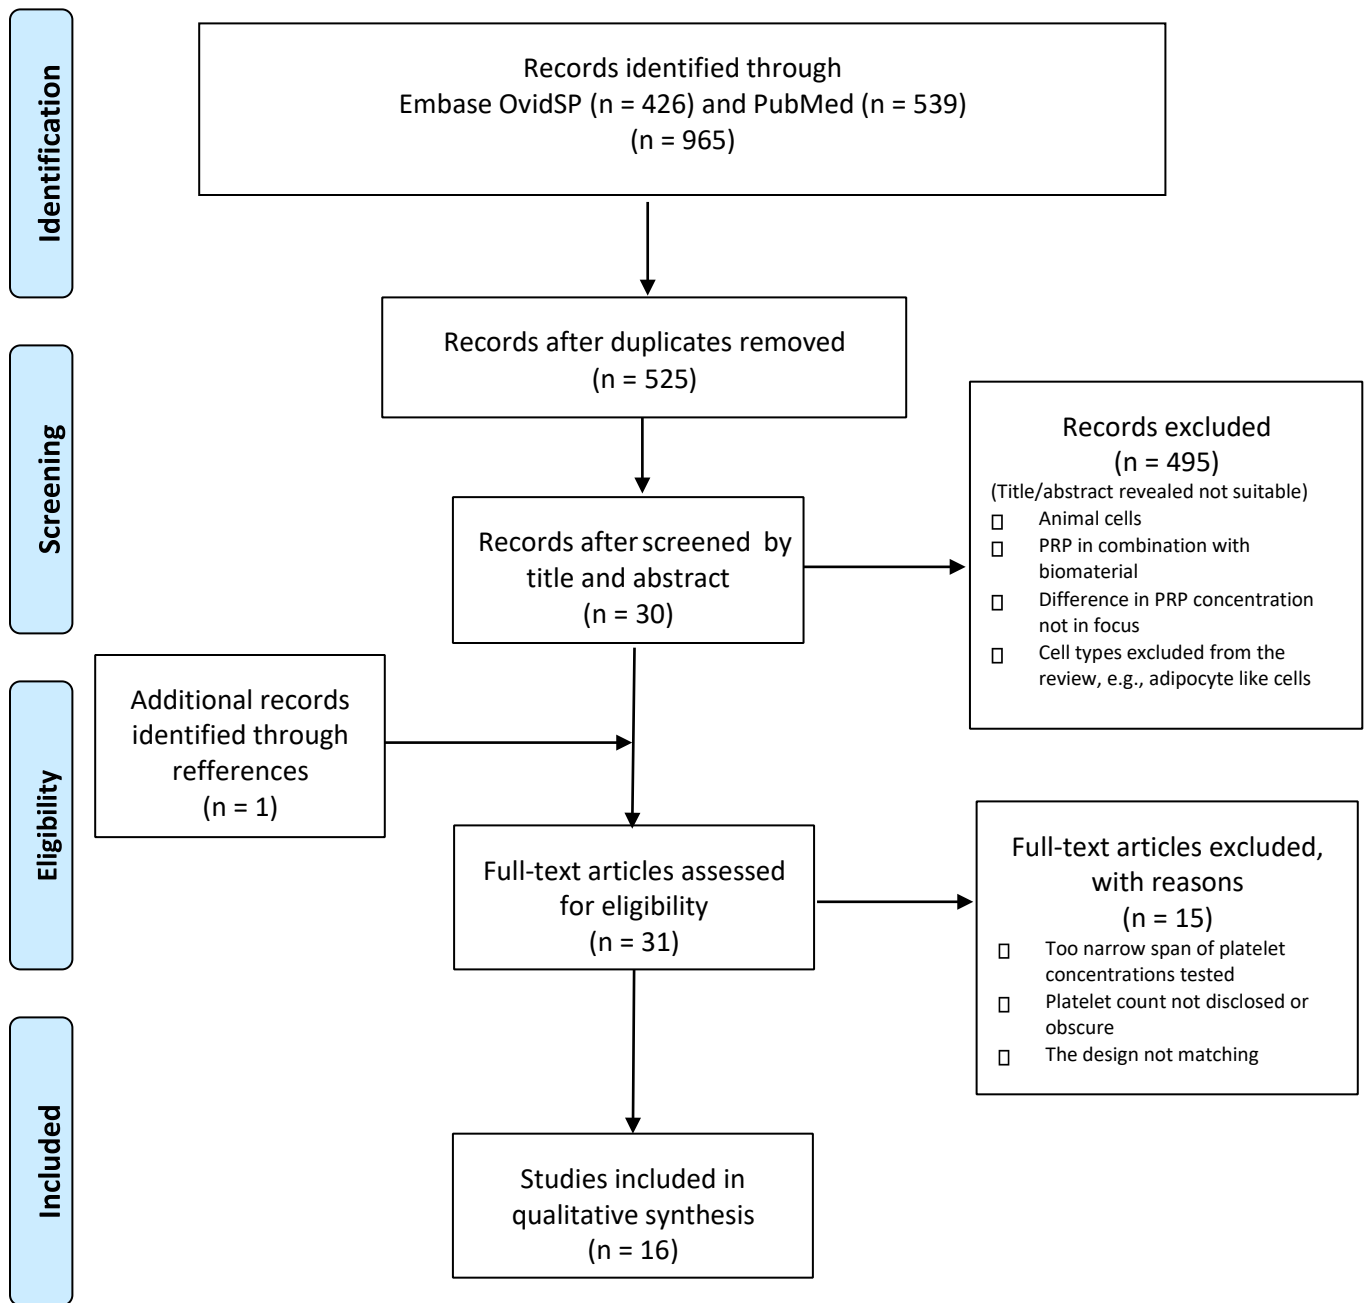

Analyses: The PRISMA Statement. PLoS Med 6(7): e1000097. doi:10.1371/journal.pmed1000097

For more information, visit [www.prisma-statement.org](http://www.prisma-statement.org).
